# Supplementary material for: Broadband photoluminescence toward the NIR II region and stable green ceramic pigments based on a novel NaBaScSi 2 O 7 : x Cr silicate phosphor
Source: Royal Society of Chemistry journal article supplement (doi:10.1039/d4tc05115g), 2025-01-01
Supplement: d4tc05115g1.pdf [file d4tc05115g1.pdf]

# Broadband photoluminescence toward NIR II region and stable green ceramic pigments based on a novel NaBaScSi<sub>2</sub>O<sub>7</sub>: xCr silicate phosphor

Xuejiao Wang,<sup>a\*</sup> Sihan Yang,<sup>a</sup> Feng Jiang,<sup>b</sup> Jiantong Wang,<sup>a</sup> Changshuai Gong,<sup>a</sup> Ji-Guang Li<sup>c\*</sup>

<sup>a</sup>College of Chemistry and Materials Engineering, Bohai University, Jinzhou, Liaoning 121007, China

<sup>b</sup>Department of Material Science and Engineering, Jingdezhen Ceramic University, Jingdezhen, Jiangxi 333000, China

<sup>c</sup>Research Center for Electronic and Optical Materials, National Institute for Materials Science, Tsukuba, Ibaraki 305-0044, Japan

\*Corresponding author

Dr. Xuejiao Wang  
Bohai University  
Jinzhou, China  
Tel: +86-416-3400708  
E-mail: [wangxuejiao@bhu.edu.cn](mailto:wangxuejiao@bhu.edu.cn)

Dr. Ji-Guang Li  
National Institute for Materials Science  
Tsukuba, Japan  
Tel: +81-29-860-4394  
E-mail: [li.jiguang@nims.go.jp](mailto:li.jiguang@nims.go.jp)

**Table S1.** A comparison of the luminescent properties of Cr<sup>3+</sup>-activated broadband NIR phosphors with those of this work.

| Phosphor                                                                                                                                  | $\lambda_{em}/nm$ | $\lambda_{em}/nm$ | FWHM/nm | $I@T/^{\circ}C$ | Refs.        |
|-------------------------------------------------------------------------------------------------------------------------------------------|-------------------|-------------------|---------|-----------------|--------------|
| Emission wavelengths in NIR-I region (650-900 nm)                                                                                         |                   |                   |         |                 |              |
| La <sub>3</sub> Sc <sub>2</sub> Ga <sub>3</sub> O <sub>12</sub> : Cr <sup>3+</sup>                                                        | 480               | 818               | 145     | <60%@150        | [1]          |
| LiInP <sub>2</sub> O <sub>7</sub> : Cr <sup>3+</sup>                                                                                      | 460               | 860               | 165     | 2.2%@100        | [2]          |
| ScBO <sub>3</sub> : Cr <sup>3+</sup>                                                                                                      | 450               | 800               | 120     | 49%@150         | [3]          |
| BaSnSi <sub>3</sub> O <sub>9</sub> : Cr <sup>3+</sup>                                                                                     | 449               | 806               | 162     | 38%@150         | [4]          |
| K <sub>3</sub> GaF <sub>6</sub> : Cr <sup>3+</sup>                                                                                        | 442               | 750               | 140     | <50%@50         | [5]          |
| Sr <sub>8</sub> MgLa(PO <sub>4</sub> ) <sub>7</sub> : Cr <sup>3+</sup>                                                                    | 490               | 870               | 140     | ≈15%@150        | [6]          |
| LiScP <sub>2</sub> O <sub>7</sub> : Cr <sup>3+</sup>                                                                                      | 470               | 880               | 170     | 20%@150         | [7]          |
| CaSc <sub>2</sub> O <sub>4</sub> : Cr <sup>3+</sup>                                                                                       | 470               | 819               | 170     | ≈35%@150        | [8]          |
| CaMgGe <sub>2</sub> O <sub>6</sub> : Cr <sup>3+</sup>                                                                                     | 450               | 845               | 160     | ≈50%@150        | [9]          |
| Ca <sub>3</sub> Sc <sub>2</sub> Si <sub>3</sub> O <sub>12</sub> : Cr <sup>3+</sup>                                                        | 460               | 770               | 100     | 50%@150         | [10]         |
| Lu <sub>2</sub> CaMg <sub>2</sub> Ge <sub>3</sub> O <sub>12</sub> : Cr <sup>3+</sup>                                                      | 455               | 795               | 152     | 67.1%@150       | [11]         |
| Y <sub>0.57</sub> La <sub>0.72</sub> Sc <sub>2.71</sub><br>(BO <sub>3</sub> ) <sub>4</sub> : Cr <sup>3+</sup>                             | 466               | 850               | 172     | 41%@100         | [12]         |
| NaScGe <sub>2</sub> O <sub>6</sub> : Cr <sup>3+</sup>                                                                                     | 490               | 895               | 162     | 20%@150         | [13]         |
| SrGa <sub>2</sub> O <sub>4</sub> : Cr <sup>3+</sup>                                                                                       | 420               | 700               | 170     | 56%@150         | [14]         |
| LiScSi <sub>2</sub> O <sub>6</sub> : Cr <sup>3+</sup>                                                                                     | 460               | 845               | 156     | 75%@150         | [15]         |
| Sr <sub>9</sub> Ga(PO <sub>4</sub> ) <sub>7</sub> : Cr <sup>3+</sup>                                                                      | 485               | 848               | 150     | <5%@150         | [16]         |
| K <sub>6</sub> Li <sub>0.9</sub> Na <sub>0.1</sub> CaSc <sub>2</sub><br>(B <sub>5</sub> O <sub>10</sub> ) <sub>3</sub> : Cr <sup>3+</sup> | 465               | 825               | 167     | 50%@125         | [17]         |
| GaTaO <sub>4</sub> : Cr <sup>3+</sup>                                                                                                     | 470               | 825               | 127     | 74%@100         | [18]         |
| Emission wavelengths toward NIR-II region (>900 nm)                                                                                       |                   |                   |         |                 |              |
| InTaO <sub>4</sub> : Cr <sup>3+</sup>                                                                                                     | 510               | 975               | 196     | <5%@150         | [18]         |
| CaSc <sub>0.85</sub> Al <sub>1.15</sub> SiO <sub>6</sub> : Cr <sup>3+</sup>                                                               | 460               | 950               | 205     | 47%@100         | [19]         |
| NaInGe <sub>2</sub> O <sub>6</sub> : Cr <sup>3+</sup>                                                                                     | 460               | 935               | 170     | 43%@150         | [20]         |
| LiSc <sub>0.5</sub> Ga <sub>0.5</sub> W <sub>2</sub> O <sub>8</sub> : Cr <sup>3+</sup>                                                    | 524               | 998               | 200     | <40%@150        | [21]         |
| LiIn <sub>2</sub> SbO <sub>6</sub> : Cr <sup>3+</sup>                                                                                     | 460               | 965               | 217     | <10%@150        | [22]         |
| Cs <sub>2</sub> NaInCl <sub>6</sub> : Cr <sup>3+</sup>                                                                                    | 290               | 958               | 165     | -               | [23]         |
| ZnWO <sub>4</sub> : Cr <sup>3+</sup>                                                                                                      | 520               | 987               | 212     | -               | [24]         |
| NaBaScSi <sub>2</sub> O <sub>7</sub> : Cr <sup>3+</sup>                                                                                   | 493               | 974               | 140     | 51%@150         | This<br>work |

**Table S2.** Experimental parameters of powder XRD and refined crystallographic data for NaBaSc<sub>0.95</sub>Si<sub>2</sub>O<sub>7</sub>: 0.05Cr<sup>3+</sup>.

| Chemical Formula                       | NaBaSc <sub>0.95</sub> Si <sub>2</sub> O <sub>7</sub> : 0.05Cr <sup>3+</sup> |
|----------------------------------------|------------------------------------------------------------------------------|
| Diffractometer                         | Model Ultima IV                                                              |
| Radiation type                         | Cu K $\alpha$ , $\lambda = 1.54060 \text{ \AA}$                              |
| 2 $\theta$ interval (°)                | 5.00-100.00                                                                  |
| Step size of 2 $\theta$ (°)            | 0.01                                                                         |
| Space group                            | <i>P2<sub>1</sub>/m</i>                                                      |
| <i>a</i> (Å)                           | 6.84649(9)                                                                   |
| <i>b</i> (Å)                           | 5.62458(7)                                                                   |
| <i>c</i> (Å)                           | 8.81783(13)                                                                  |
| $\alpha$ (°)                           | 90                                                                           |
| $\beta$ (°)                            | 109.2808(11)                                                                 |
| $\gamma$ (°)                           | 90                                                                           |
| <i>V</i> (Å <sup>3</sup> )             | 320.5171(79)                                                                 |
| <sup>b</sup> <i>R<sub>p</sub></i> (%)  | 8.73                                                                         |
| <sup>c</sup> <i>R<sub>wp</sub></i> (%) | 5.76                                                                         |
| <i>R<sub>exp</sub></i> (%)             | 3.11                                                                         |
| <sup>d</sup> <i>S</i>                  | 2.80                                                                         |

$${}^b R_p = \sum |y_i - y_{C,i}| / \sum y_i; {}^c R_{wp} = \left[ \sum w_i |y_i - Y_{C,i}|^2 / \sum w_i y_i^2 \right]^{1/2}; {}^d S = R_{wp} / R_{exp}$$

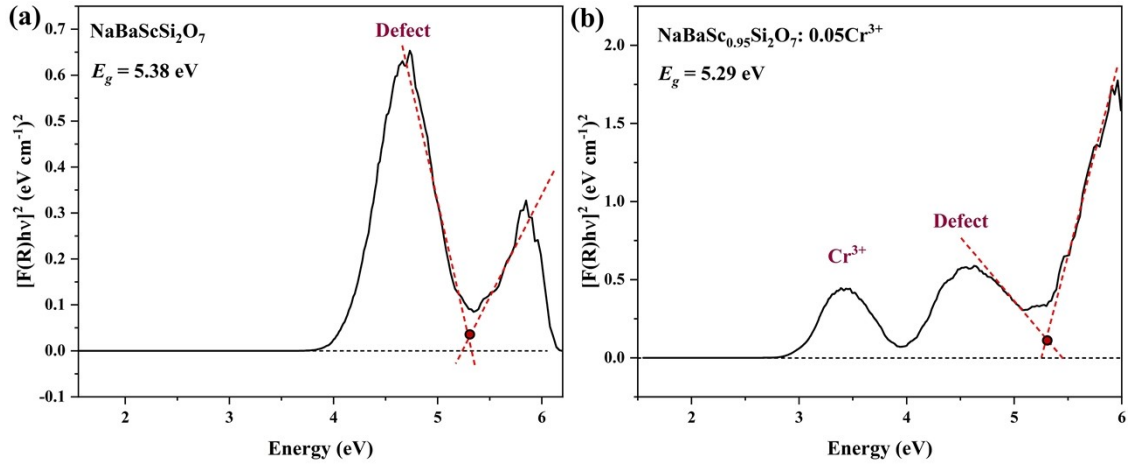

**Fig. S1** The band gap determination of (a)NaBaScSi<sub>2</sub>O<sub>7</sub> and (b) NaBaSc<sub>0.95</sub>Si<sub>2</sub>O<sub>7</sub>: 0.05Cr<sup>3+</sup>.

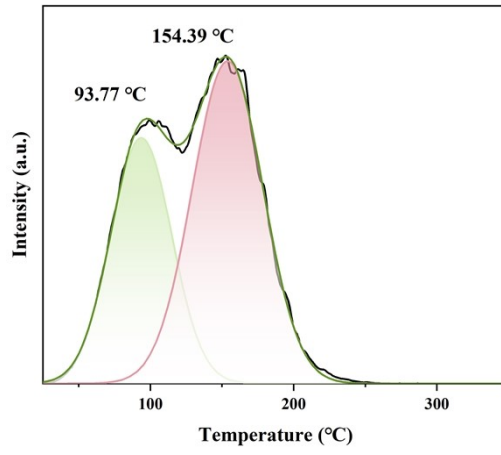

**Fig. S2** Thermoluminescence analysis of the NaBaScSi<sub>2</sub>O<sub>7</sub>.

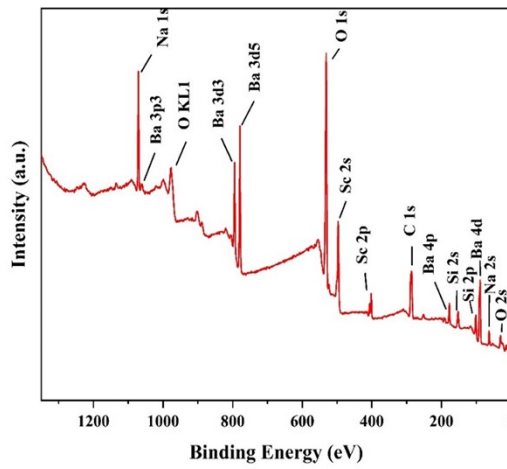

**Fig. S3** The XPS spectrum of NaBaSc<sub>0.95</sub>Si<sub>2</sub>O<sub>7</sub>: 0.05Cr<sup>3+</sup>.

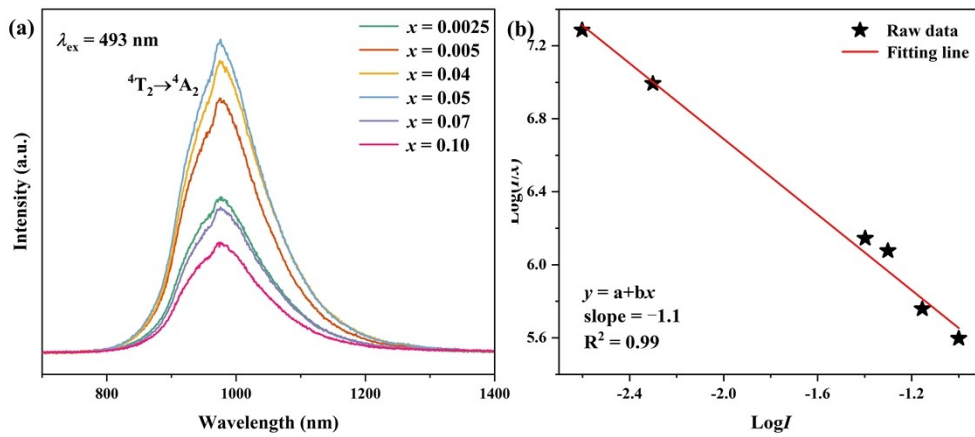

**Fig. S4** (a) The PL spectra of NaBaSc<sub>1-x</sub>Si<sub>2</sub>O<sub>7</sub>: xCr<sup>3+</sup>, (b) linear fit of the relationship between log(*I*/*x*) and log*I*.

The critical energy transfer distance  $R_c$  between activators is calculated using Blasse's equation:<sup>25</sup>

$$R_c \approx 2 \left( \frac{3V}{4\pi X_c N} \right)^{1/3} \quad (1)$$

where  $V$  is the volume of the crystallographic unit cell,  $X_c$  is the critical concentration, and  $N$  is the

number of cationic sites per unit cell replaced by activators. The volume  $V$ , the number of cations per unit cell  $N$ , and the critical concentration  $X_c$  are  $320.5171 \text{ \AA}^3$ , 2, and 0.05, respectively. The type of the electric multipole interactions can be determined using the following formula:<sup>26</sup>

$$\frac{I}{x} = \frac{k}{1 + \beta(x)^{\theta/3}} \quad (2)$$

where  $I$  is the emission intensity,  $x$  is the content of  $\text{Cr}^{3+}$ ,  $k$  and  $\beta$  are constants, and  $\theta$  is determined by the mode of the multipole-multipole interaction, namely, non-radiative energy transfer between neighboring activator ions ( $\theta = 3$ ), dipole-dipole ( $\theta = 6$ ), dipole-quadrupole ( $\theta = 8$ ), or quadrupole-quadrupole ( $\theta = 10$ ).

**Table S3.** The results of fluorescence decay fitting for the 974 nm emission of the  $\text{NaBaSc}_{1-x}\text{Si}_2\text{O}_7:x\text{Cr}^{3+}$  phosphor.

| $x$    | $\lambda_{\text{em}}$<br>(nm) | $A_1$     | $A_2$      | $\tau_1$ | $\tau_2$ | $\chi^2$ | Lifetime<br>( $\mu\text{s}$ ) |
|--------|-------------------------------|-----------|------------|----------|----------|----------|-------------------------------|
| 0.0025 | 974                           | 173301.75 | -168787.59 | 97.40    | 97.43    | 1.011    | 96.26                         |
| 0.005  | 974                           | 4699.73   | 66.21      | 89.43    | 239.43   | 1.178    | 94.88                         |
| 0.04   | 974                           | 2954.21   | 1925.70    | 55.04    | 95.85    | 1.025    | 76.74                         |
| 0.05   | 974                           | 2854.76   | 2070.81    | 52.17    | 93.77    | 1.063    | 75.71                         |
| 0.07   | 974                           | 2324.43   | 2173.69    | 42.63    | 86.97    | 1.013    | 71.72                         |
| 0.10   | 974                           | 2231.09   | 2350.65    | 47.68    | 89.86    | 0.942    | 75.73                         |

**Table S4.** The results of fluorescence decay fitting for the 974 nm emission of the  $\text{NaBaSc}_{0.95}\text{Si}_2\text{O}_7:0.05\text{Cr}^{3+}$  phosphor at different temperature.

| Temperature | $\lambda_{\text{em}}$<br>(nm) | $A_1$   | $A_2$   | $\tau_1$ | $\tau_2$ | $\chi^2$ | Lifetime<br>( $\mu\text{s}$ ) |
|-------------|-------------------------------|---------|---------|----------|----------|----------|-------------------------------|
| RT          | 974                           | 2854.76 | 2070.81 | 52.17    | 93.77    | 1.063    | 75.71                         |
| 323 K       | 974                           | 3770.58 | 1183.66 | 57.15    | 102.96   | 0.995    | 73.70                         |
| 348 K       | 974                           | 3522.25 | 1368.54 | 53.79    | 93.28    | 0.981    | 69.69                         |
| 373 K       | 974                           | 4215.74 | 685.7   | 53.32    | 102.7    | 0.995    | 65.10                         |
| 398 K       | 974                           | 4187.34 | 573.76  | 49.55    | 93.6     | 1.027    | 58.61                         |
| 423 K       | 974                           | 4262.29 | 454.56  | 43.74    | 81.71    | 1.033    | 50.05                         |
| 448 K       | 974                           | 5027.28 | 14.05   | 38.91    | 190.78   | 1.075    | 40.96                         |
| 473 K       | 974                           | 5062.61 | 1.23    | 30.29    | 500      | 1.049    | 32.17                         |
| 498 K       | 974                           | -606.18 | 5585.33 | 10.02    | 22.09    | 1.068    | 22.71                         |
| 523 K       | 974                           | -404.01 | 5249.23 | 1.33     | 16.54    | 0.970    | 16.63                         |

## References

- [1] B. Malysa, A. Meijerink and T. Jüstel, *J. Lumin.*, 2018, **202**, 523-531.
- [2] H. Zhang, J. Zhong, X. Zhang, H. Yang, Z. Mu, W. Zhao, *J. Alloy. Compd.*, 2022, **894**: 162386.
- [3] M.-H. Fang, P.-Y. Huang, Z. Bao, N. Majewska, T. Leśniewski, S. Mahlik, M. Grinberg, G. Leniec, S. M. Kaczmarek, C.-W. Yang, K.-M. Lu, H.-S. Sheu and R.-S. Liu, *Chem. Mater.*, 2020, **32**, 2166-2171.
- [4] Y. Zhang, Y. Liang, S. Miao, D. Chen, S. Yan and J. Liu, *Inorg. Chem. Front.* 2021, **8**, 5186-5194.
- [5] C. Lee, Z. Bao, M.-H. Fang, T. Lesniewski, S. Mahlik, M. Grinberg, G. Leniec, S. M. Kaczmarek, M. G. Brik, Y.-T. Tsai, T.-L. Tsai and R.-S. Liu, *Inorg. Chem.*, 2019, **59**, 376-385.
- [6] B. Malysa, A. Meijerink and T. Jüstel, *Opt. Mater.*, 2018, **85**, 341-348.
- [7] L. Yao, Q. Shao, S. Han, C. Liang, J. He and J. Jiang, *Chem. Mater.*, 2020, **32**, 2430-2439.
- [8] B. Malysa, A. Meijerink, W. Wu, T. Jüstel, *J. Lumin.*, 2017, **190**, 234-241.
- [9] L. Fang, L. Zhang, H. Wu, H. Wu, G. Pan, Z. Hao, F. Liu and J. Zhang, *Inorg. Chem.*, 2022, **61**, 8815-8822.
- [10] Y. Zhou, X. Li, T. Seto and Y. Wang, *ACS Sustain. Chem. Eng.*, 2021, **9**, 3145-3156.
- [11] M. U. Dumesso, W. Xiao, G. Zheng, E. T. Basore, M. Tang, X. Liu and J. Qiu, *Adv. Opt. Mater.*, 2022, **10**, 2200676.
- [12] H. Wu, L. Jiang, K. Li, C. Li and H. Zhang, *J. Mater. Chem. C.*, 2021, **9**, 11761-11771.
- [13] X. Zhou, W. Geng, J. Li, Y. Wang, J. Ding and Y. Wang, *Adv. Opt. Mater.*, 2020, **8**, 1902003.
- [14] K. Sudarshan, A. Balhara, M. S. Kambli, R. T. Parayil, S. M. Patil and S. K. Gupta, *Mater. Res. Bull.*, 2024, **169**, 112537.
- [15] Y. Yan, M. Shang, S. Huang, Y. Wang, Y. Sun, P. Dang and J. Lin, *ACS Appl. Mater. Interfaces*, 2022, **14**, 8179-8190.
- [16] F. Zhao, H. Cai, Z. Song and Q. Liu, *Chem. Mater.*, 2021, **33**, 3621-3630.

- [17] J. Wang, L. Jiang, R. Pang, S. Zhang, D. Li, K. Li, C. Li and H. Zhang, *Inorg. Chem. Front.*, 2022, **9**, 2240-2251.
- [18] Q. Zhang, D. Liu, P. Dang, H. Lian, G. Li and J. Lin, *Laser Photonics Rev.* 2022, **16**, 2100459.
- [19] G. Liu, M. S. Molokeev and Z. Xia, *Chem. Mater.*, 2022, **34**, 1376-1384.
- [20] X. Ding, Q. Zhang, Z. Li and Y. Min, *J. Mater. Chem. C*, 2021, **9**, 16022-16032.
- [21] J. Liu, D. Sun, Z. Lyu, S. Shen, S. Wei, L. Zhou, X. Zhang, H. Hu and H. You, *Adv. Opt. Mater.*, 2024, **12**, 2401883.
- [22] D. Liu, G. Li, P. Dang, Q. Zhang, Y. Wei, H. Lian, M. Shang, C.-C. Lin and J. Lin, *Angew. Chem. Int. Edit.* 2021, **60**, 14644-14649.
- [23] A. Zhang, Y. Liu, G. Liu and Z. Xia, *Chem. Mater.*, 2022, **34**, 3006-3012.
- [24] Q. Xiao, W. Zhou, J. Fan, L. Zhou, P. Chen, F. Mo, J. Huang, X. Liu and X. Zhang, *Ceram. Int.*, 2023, **49**, 25682-25688.
- [25] G. Blasse. *Phys. Lett. A.* 1968, **28**, 444-445.
- [26] L. G. Van Uitert, *J. Electrochem. Soc.* 1967, **114**, 1048.
